# Supplementary material
Source: HighWire-hosted journal article supplement (https://ijssurgery.com/content/16/6/969)
Supplement: inline-supplementary-material-1 [file inline-supplementary-material-1.docx]

**Appendix file 1: Search 23.11.2020**

Pubmed Search

((("Spinal Cord Compression"[Mesh]) OR (Spinal Cord Compression*[tiab] OR Compressive Myelopath*[tiab] OR cervical degenerative myelopath*[tiab] OR cervical myelopath*[tiab] OR degenerative myelopath*[tiab] OR spondylotic myelopath*[tiab] OR spondylotic cervical myelopath*[tiab]) OR ("Cervical Vertebrae"[Mesh]) OR (cervical vertebrae[tiab]) OR ("Spondylosis"[Mesh]) OR (Cervical Spondylosis[tiab])) AND (("anterior cervical discectomy and fusion"[tiab]) OR ("Spinal Fusion"[Mesh]) OR (Spinal Fusion*[tiab]) OR ("Diskectomy"[Mesh]) OR (ACDF[tiab] OR Anterior cervical discectomy and fusion*[tiab] OR Anterior cervical diskectomy and fusion*[tiab] OR ACD[tiab] OR Anterior cervical discectom*[tiab] OR Anterior cervical diskectom*[tiab] OR ACDA[tiab] OR Anterior cervical discectomy and arthroplast*[tiab] OR Anterior cervical diskectomy and arthroplast*[tiab] OR cervical arthroplast*[tiab] OR discus prothes*[tiab] OR Corporectom*[tiab] OR cervical implant*[tiab] OR interbody fusion*[tiab]) OR (anterior surgical decompression*[tiab]))) AND ((randomized controlled trial[pt] OR controlled clinical trial[pt] OR randomized[tiab] OR randomly[tiab] OR trial[tiab] OR groups[tiab]) OR ("cohort studies"[mesh] OR "case-control studies"[mesh] OR "comparative study"[pt] OR "cohort"[tw] OR "compared"[tw] OR "groups"[tw] OR "case control"[tw]) OR ("Prospective Studies"[Mesh]) OR (prospecti*[tiab]))

Cochrane

(Spinal cord compression*) OR (compressive myelopath*) OR (cervical myelopath*) OR (cervical degenerative myelopath*) OR (degenerative myelopath*) OR (spondylotic myelopath*) OR (spondylotic cervical myelopath*) OR (cervical vertebra*) OR (spondylosis) OR (cervical spondylosis) OR (Cervical spine) OR (Compressio medulla*) OR (medullary compression*) in Title Abstract Keyword AND (spinal fusion) OR (spine fusion) OR (diskectom*) OR (discectom*) OR (diskektom*) OR (anterior cervical spine surger*)OR (cervical disc replacement) OR (anterior vertebra* fusion) OR (anterior interbody fusion) OR (anterior spinal fusion) OR (ACDF) OR (Anterior cervical discectom* and fusion) OR (Anterior cervical diskectom* and fusion) OR (Anterior cervical diskektom* and fusion) OR (anterior cervical discectom*) OR (anterior cervical diskectom*) OR (anterior cervical diskektom*) OR (ACDA) OR (anterior cervical discectom* and arthroplast*) OR (anterior cervical diskectom* and arthroplast*) OR (anterior cervical diskektom* and arthroplast*) OR (cervical arthroplast*) OR (cervical disc arthroplast*) OR (disc prothesis) OR (corporectom*) OR (cervical implant) OR (interbody fusion) OR (anterior surgical decompression*) OR (Anterior cervical decompression and fusion) OR (anterior cervical corpectom* and fusion) in Title Abstract Keyword AND (Randomized controlled trial) OR (Randomised controlled trial) OR (controlled clinical trial) OR (controlled trial) OR (randomised) OR (randomized) OR (groups) OR (cohort stud*) OR (case-control) OR (case control) OR (case series) OR (comparative stud*) OR (cohort) OR (compared) OR (prospective stud*) OR (prospecti*) OR (RCT) OR (randomised controlled stud*) OR (randomized controlled stud*) OR (cohort analysis) in Title Abstract Keyword - (Word variations have been searched)

WEB OF SCIENCE

TS=(Spinal cord compression*) OR TS=(compressive myelopath*) OR TS=(cervical myelopath*) OR TS=(cervical degenerative myelopath*) OR TS=(degenerative myelopath*) OR TS=(spondylotic myelopath*) OR TS=(spondylotic cervical myelopath*) OR TS=(cervical vertebra*) OR TS=(spondylosis) OR TS=(cervical spondylosis) OR TS=(Cervical spine) OR TS=(Compressio medulla*) OR TS=(medullary compression*) AND TS=(spinal fusion) OR TS=(spine fusion) OR TS=(diskectom*) OR TS=(discectom*) OR TS=(diskektom*) OR TS=(ACDF) OR TS=(Anterior cervical discectom* and fusion) OR TS=(Anterior cervical diskectom* and fusion) OR TS=(Anterior cervical diskektom* and fusion) OR TS=(anterior cervical discectom*) OR TS=(anterior cervical diskectom*) OR TS=(anterior cervical diskektom*) OR TS=(ACDA) OR TS=(anterior cervical discectom* and arthroplast*) OR TS=(anterior cervical diskectom* and arthroplast*) OR TS=(anterior cervical diskektom* and arthroplast*) OR TS=(cervical arthroplast*) OR TS=(cervical disc arthroplast*) OR TS=(disc prothesis) OR TS=(corporectom*) OR TS=(cervical implant) OR TS=(interbody fusion) OR TS=(anterior surgical decompression*) OR TS=(Anterior cervical decompression and fusion) OR TS=(anterior cervical corpectom* and fusion) OR TS=(anterior cervical spine surger*) OR TS=(cervical disc replacement) OR TS=(anterior vertebra* fusion) OR TS=(anterior interbody fusion) OR TS=(anterior spinal fusion) OR TS=(ACD) AND TS=(Randomized controlled trial) OR TS=(Randomised controlled trial) OR TS=(controlled clinical trial) OR TS=(ccontrolled trial) OR TS=(randomised) OR TS=(randomized) OR TS=(groups) OR TS=(cohort stud*) OR TS=(case-control) OR TS=(case control) OR TS=(case series) OR TS=(comparative stud*) OR TS=(cohort) OR TS=(compared) OR TS=(prospective stud*) OR TS=(prospecti*) OR TS=(RCT) OR TS=(randomised controlled stud*) OR TS=(randomized controlled stud*) OR TS=(cohort analysis)

EMBASE

Spinal cord compression* or compressive myelopath* or cervical myelopath* or cervical degenerative myelopath* or degenerative myelopath* or spondylotic myelopath* or spondylotic cervical myelopath* or cervical vertebra* or spondylosis or cervical spondylosis or Cervical spine or Compressio medulla* or medullary compression*).ab. AND (spinal fusion or spine fusion or diskectom* or discectom* or diskektom* or ACDF or (Anterior cervical discectom* and fusion) or (Anterior cervical diskectom* and fusion) or (Anterior cervical diskektom* and fusion) or anterior cervical discectom* or anterior cervical diskectom* or anterior cervical diskektom* or ACDA or (anterior cervical discectom* and arthroplast*) or cervical arthroplast* or disc prothesis or cervical implant or anterior surgical decompression* or (anterior cervical corpectom* and fusion) or cervical disc replacement or anterior interbody fusion or anterior spinal fusion or (Anterior cervical decompression and fusion) or ACD or (anterior cervical diskectom* and arthroplast*) or (anterior cervical diskektom* and arthroplast*) or interbody fusion or cervical disc arthroplast* or anterior cervical spine surger* or anterior vertebra* fusion or corporectom*).ab. AND (Randomized controlled trial or Randomised controlled trial or controlled clinical trial or controlled trial or randomised or randomized or groups or cohort stud* or case-control or case control or case series or comparative stud* or cohort or compared or prospective stud* or prospecti* or RCT or randomised controlled stud* or randomized controlled stud* or cohort analysis).ab.
